1    **Attention improvement to transcranial alternating current stimulation at gamma**  
2    **frequency over the right frontoparietal network: a preliminary report**

3

4    Tien-Wen Lee <sup>a</sup>, Sergio Almeida <sup>a</sup>, Gerald Tramontano <sup>a\*</sup>

5    Note: TW Lee and S Almeida contributed equally to this research as co-first authors.

6

7    <sup>a</sup> The NeuroCognitive Institute (NCI) Clinical Research Foundation, NJ 07856, US

8

9    \* Corresponding author at The NCI Clinical Research Foundation, New Jersey, US

10   Address: 111 Howard Blvd., Suite 204, Mt. Arlington, NJ 07856

11

12   Web: <http://neuroci.com/>

13   Email: [gtramontano@neuroci.com](mailto:gtramontano@neuroci.com)

14   Tel: 973-601-0100

15   Fax: 973-710-9142

16

17   Email addresses for the other author:

18   TW Lee: [dwleeibru@gmail.com](mailto:dwleeibru@gmail.com); S Almeida: [data2@neuroci.com](mailto:data2@neuroci.com)

19

20   **Running Title:** Attention function and 40-Hz tACS

21

22   **Keywords:** Attention; Transcranial alternating current stimulation (tACS); Transcranial  
23   electrical stimulation (tES); Frontoparietal network; Test of Variables of Attention  
24   (TOVA).

# 1    **ABSTRACT**

2    **Objective** Applying transcranial alternating current stimulation (tACS) at 40 Hz to the  
3    frontal and parietal regions can improve cognitive dysfunctions. This study aimed to  
4    explore the influence of tACS at gamma frequency over right fronto-parietal (FP)  
5    region on attention.

6    **Methods** We administered Test of Variables of Attention (TOVA; visual mode) to 44  
7    participants with various neuropsychiatric diagnoses before and after 12 sessions of  
8    tACS treatment. Alternating currents at 2.0 mA were delivered to the electrode  
9    positions F4 and P4, following the 10-20 EEG convention, for 20 minutes in each  
10   session.

11   **Results** We observed significant improvement across 3 indices of the TOVA,  
12   including reduction of variability in reaction time (RT;  $P=0.0002$ ), increase in d-Prime  
13   (separability of targets and non-targets;  $P=0.0157$ ), and decrease in commission  
14   error rate ( $P=0.0116$ ). The mean RT and omission error rate largely remained  
15   unchanged.

16   **Conclusion** Artificial injection of tACS at 40 Hz over right FP network may improve  
17   attention function, especially in the domains of consistency in performance,  
18   target/non-target discrimination, and inhibitory control.

19

20

21

# 1 Introduction

2 Cortical oscillations at various frequencies have been linked to diverse cognitive  
3 functions. For instance, working memory and semantic memory functions have been  
4 respectively associated with power changes in the theta and upper alpha bands  
5 (Klimesch, 1999, Brzezicka et al., 2019). Gamma rhythms have been associated with  
6 the functioning of extensive brain networks and cognitive processes such as  
7 attention, perceptual grouping, memory, and working memory (Fell et al., 2002,  
8 Herrmann et al., 2010, Brookes et al., 2011, Lundqvist et al., 2018). With the  
9 introduction of transcranial alternating current stimulation (tACS), it becomes  
10 possible to inject artificial oscillation into the brain and study its causal influence on  
11 neural rhythmicity and cognition.

12 Correspondent with neuroanatomical understanding, tACS at theta over  
13 anterior frontal and medial temporal and tACS at gamma over occipitoparietal  
14 regions lead to improvement in working memory task performance (Park et al., 2022,  
15 Manippa et al., 2024a, Wischnewski et al., 2024). The tACS at theta/gamma ranges  
16 with anterior/posterior montages may improve episodic memory (Varastegan et al.,  
17 2023), while the theta-gamma cross-frequency tACS targeting the prefrontal cortex  
18 may enhance visuomotor learning (Diedrich et al., 2024). The tACS at gamma  
19 frequency over right parietal and left temporo-parietal regions may respectively  
20 modulate endogenous attention and auditory spatial attention (Hopfinger et al.,  
21 2017, Wostmann et al., 2018). The promising potential of gamma tACS in addressing  
22 mild cognitive impairment (MCI) and early stages of Alzheimer’s disease (AD) has  
23 been suggested (Manippa et al., 2024b). Positive evidence regarding the application  
24 of tACS to other neuropsychiatric conditions, such as dyslexia, anxiety, depression,

1 and attention-deficit/hyperactivity disorder (ADHD), is beginning to accumulate  
2 (Dallmer-Zerbe et al., 2020, Lee et al., 2023).

3 The clinical effects of tACS appear to be frequency- and region-specific as briefly  
4 summarized above. It is noteworthy, however, that sometimes tACS may be  
5 detrimental to neuropsychological performance. For example, prefrontal gamma  
6 modulation may impair working memory (Wischnewski et al., 2024), and beta tACS  
7 may reduce motor cortex excitability (Zaghi et al., 2010). Our recent report suggested  
8 that tACS may desynchronize underlying neural oscillation (Lee and Tramontano,  
9 2023). It is thus imperative to empirically examine if a specific tACS protocol is  
10 beneficial. It is acknowledged that attention function engages broad neural  
11 substrates, relatively right-lateralized for visuospatial processing, particularly  
12 fronto-parietal (FP) network (Shipp, 2004, Thiebaut de Schotten et al., 2011). To the  
13 best of our knowledge, the influence of gamma tACS over right FP regions on the  
14 attention function has never been specifically examined. The importance of  
15 investigating transcranial electrical stimulation (tES) on attention cannot be  
16 overstated, as attention is essential for the effective execution of other cognitive  
17 processes. If tACS does indeed influence attention, it would impact the  
18 neuropsychological interpretation of pertinent research.

19 Among the frequency bands of brain waves, we are particularly interested in  
20 gamma, given its coupling with downward spectra (delta to beta), co-bursts with beta  
21 in volitional control, close relevance to attention, and its roles in cognitive  
22 impairment in various neurocognitive conditions (Fell et al., 2002, Fan et al., 2007,  
23 Foster and Parvizi, 2012, Goodman et al., 2018). This study was designed to trace the  
24 changes in attention function via the Test of Variables of Attention (TOVA) following

1 12 sessions of tACS treatment (Leark et al., 2008).

2

### 3 **Materials and Methods**

#### 4 *Participants*

5 The research protocol centered on patients exhibiting attention and other cognitive  
6 deficits who underwent 40 Hz tACS treatment applied to the right frontal and  
7 parietal regions. A consent form was acquired for each patient before the  
8 commencement of treatment. We conducted a review of data collected from our  
9 clinics between 2018 and 2022, with prior approval from a private Review Board  
10 (Pearl IRB; <https://www.pearlirb.com/>). Forty-four cognitively impaired patients were  
11 identified who underwent full tACS treatment as well as pre- and post-treatment  
12 TOVA assessments.

13

#### 14 *Administration of tACS*

15 We employed the FDA-approved neuromodulation device called Starstim-8,  
16 developed by Neuroelectronics, Inc., to address cognitive deficits arising from different  
17 causes. The device utilizes electrodes connected through wires to a rechargeable  
18 battery, delivering electric currents directly to the scalp and brain. Prior to attaching  
19 the electrodes, the scalp underwent a gentle cleansing with skin preparation gel.  
20 Subsequently, conductive gel was applied to facilitate proper electrode-to-scalp  
21 contact. These steps were essential to maintain optimal electrode contact and  
22 ensure that the impedance level remained below 5 k ohms (DaSilva et al., 2011).

23 The montage of electrodes covered the right lateral side of the head at F4 and  
24 P4 positions in terms of the 10-20 EEG convention. The peak current intensity was

2.0 mA, with sinewave currents oscillating at 40 Hz and alternating between electrodes F4 and P4, see Figure 1 (A). The simulation of electric field distribution is illustrated in Figure 1 (B). During the neuromodulation session, the subjects were asked to practice computerized cognitive training games (<https://www.happyneuronpro.com/>). To familiarize patients with tES, we implemented a gradual dose escalation strategy during the initial three sessions. This strategy involved the following current levels: 1.0 mA for the first session, 1.5 mA for the second session, and 2.0 mA for the third session. Each stimulation session had a duration of 20 minutes, commencing with a 1-minute ramp-up phase and concluding with a 30-second ramp-down phase to minimize skin irritation. The treatment sessions were completed in 3 weeks.

12

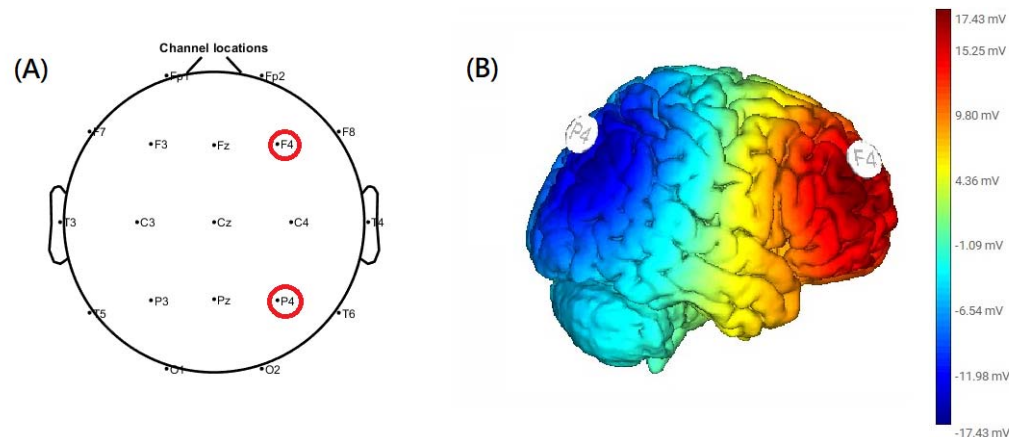

13

14 Fig. 1. (A) An illustration of the F4 and P4 positions on the scalp. (B) Simulation of  
15 tACS at 40 Hz over right FP regions.  
16

### 17 TOVA administration

18 Before the initial treatment and after the last neuromodulation session, TOVA was  
19 administered via the platform Inquisit (<https://www.millisecond.com/>). TOVA is an

1 individually administered computerized test designed to evaluate attention and  
 2 impulse control in both normal and clinical populations (Leark et al., 2008). This  
 3 study exclusively reported findings related to the visual mode, although  
 4 acknowledging the availability of both visual and auditory modes for assessment  
 5 purposes. The visual TOVA presents two easily distinguishable geometric figures  
 6 (target and non-target) at the center of the computer screen. These stimuli appear  
 7 for 100 milliseconds at intervals of 2000 milliseconds. Participants are instructed to  
 8 respond to the target stimulus as rapidly as possible. During the first half of the test  
 9 (stimulus infrequent condition), the target stimulus is presented in 22.5% of the trials  
 10 (n=72), whereas during the second half (stimulus frequent condition), it appears in  
 11 77.5% of the trials (n=252). By manipulating the ratio of target to non-target stimuli,  
 12 the design allows investigating the impact of varying response demands on the  
 13 performance. Lumping together all the trials, this preliminary report focuses on five  
 14 overarching indices: mean reaction time (RT), variability of RT, d-Prime (an indicator  
 15 of the discriminability between target and non-target), commission errors, and  
 16 omission errors. The TOVA manual provides age- and gender-matched norms (mean  
 17 and standard deviation) so that the severity of impairment before treatment can be  
 18 appraised by the converted z-scores.

19

## 20 **Results**

21 The age of the 44 patients ranged from 6.2 to 70.3 years, with a mean  $\pm$  SD of 25.1  $\pm$   
 22 17.6 years. Among them, there were 28 males and 16 females. All patients tolerated  
 23 the maximum tES current at 2.0 mA. Their diagnoses include ADHD (n=13), mild to  
 24 moderate intellectual disability (9), learning disability (4), autism (3), non-amnestic

MCI (9), AD-MCI (2), traumatic brain injury (2), and mood disorder (2). At baseline, the average RT variability and d-Prime are worse than age-matched norms by z-scores 3.3 and 2.3. Commission and omission errors are also higher than normal population (z-scores are absent due to deviations of the raw scores from a normal distribution). The side effects were minimal, consistent with another tACS study we conducted (Lee et al., 2023).

**Table 1** Paired t-tests of TOVA profiles before and after gamma tACS treatment

|                     | Before (std)  | After (std)   | t val | P val    | case no |
|---------------------|---------------|---------------|-------|----------|---------|
| RT variability (ms) | 207.4 (113.7) | 173.3 (97.3)  | -4.12 | 0.000171 | 44      |
| z-score             | 3.3 (2.7)     | 2.3 (2.3)     |       |          |         |
| RT (ms)             | 518.3 (156.1) | 502.0 (157.4) | -0.93 | 0.356    | 44      |
| z-score             | 1.6 (2.0)     | 1.4 (2.1)     |       |          |         |
| d-Prime             | 3.3 (1.2)     | 3.5 (1.1)     | 2.52  | 0.0157   | 43      |
| z-score             | -2.3 (1.7)    | -2.2 (1.8)    |       |          |         |
| Commission (%)      | 9.6 (0.1)     | 6.6 (6.1)     | -2.64 | 0.0116   | 44      |
| Omission (%)        | 7.1 (8.0)     | 7.3 (11.8)    | 0.15  | 0.883    | 44      |

RT: reaction time, ms: millisecond. Z-scores are referred to the age-matched norm. One subject has missing data of d-Prime.

## Discussion

tES has been widely applied as a tool for basic and clinical research (Guleyupoglu et al., 2013). In addition to offering a research gateway to modulate brain rhythms and cognitive processes, studies have begun to support tACS as a treatment option for neuropsychiatric conditions (Lee et al., 2023, Manipa et al., 2024b). Previous research has investigated the potential of tACS at the gamma range to ameliorate various cognitive dysfunctions, predominantly episodic memory and working memory (Park et al., 2022, Varastegan et al., 2023, Manipa et al., 2024a,



1 Wischnewski et al., 2024). Relatively few studies have delved into its impact on  
 2 attention function (Hopfinger et al., 2017, Wostmann et al., 2018). Using TOVA, we  
 3 evaluated attention function changes subsequent to 12 treatment sessions of 2mA  
 4 tACS at 40 Hz over right frontal and parietal regions, aiming to ameliorate cognitive  
 5 deficits stemming from diverse diagnoses. Through the comparisons of  
 6 post-treatment minus baseline TOVA indices, our results showed that the treatment  
 7 protocol benefited several, not all, aspects of attention function, including reduction  
 8 of variability in RT, decrease of commission error, and improvement in separability of  
 9 target and non-target, i.e., d-Prime. The mean RT and omission error rate largely  
 10 remained unchanged.

11 Each of the five selected indices from TOVA addresses a different domain of  
 12 attention function (Leark et al., 2007). RT provides a general measure of processing  
 13 speed and efficiency, whereas the variability of RT indicates sustained attention or  
 14 the stability of performance. Commission and omission error rates respectively  
 15 reflect impulsivity (tendency to respond to non-target stimuli) and attentional lapses  
 16 (failure to respond to target stimuli). The former is relevant to deficits in response  
 17 inhibition or inhibitory control, and the latter to deficits in vigilance or sustained  
 18 attention. Overall, our results implied that gamma tACS over right FP network may  
 19 benefit the consistency in performance and inhibitory control but has little impact on  
 20 processing speed and attentional lapses. It is not surprising that the mean RT was  
 21 resistant to the impact of tACS since the task instruction requires the participants to  
 22 respond as quickly as possible (p.3 in professional manual (Leark et al., 2008)). The  
 23 improvement in discriminating between targets and non-targets may be more closely  
 24 linked to the decrease in commission errors rather than omission errors, which

1 appeared to be unaffected by the treatment.

2       Complicated neural substrates participate in the attention functioning. For  
3 example, previous functional MRI research revealed that greater pre-stimulus brain  
4 activities in the default-mode network were associated with longer RT, and the BOLD  
5 responses in the posterior cingulate, left inferior frontal gyrus, and left middle  
6 temporal gyrus increased proportionally with RT (Tam et al., 2015). In contrast, RT  
7 variability (intra-individual, as in TOVA) was predicted by the activity in the left  
8 anterior cingulate cortex (Johnson et al., 2015). Error-related processing involved a  
9 broad neural matrix, including anterior cingulate cortex, pre-supplementary motor  
10 area, bilateral insula, thalamus, and inferior parietal lobule (Hester et al., 2004). The  
11 neural mechanisms behind the therapeutic benefits of tACS are still being  
12 investigated. Nevertheless, with tES initiating low-resolution and wide-ranging  
13 neuromodulation (see Figure 1), we posit that our tACS targeting the FP network may  
14 influence extensive neural substrates beyond those underneath F4 and P4, thereby  
15 modulating neural networks/nodes related to attentional function.

16       Our research samples were drawn from a heterogeneous mix of  
17 neuropsychiatric populations. In conjunction with sporadic reports supporting the  
18 efficacy of gamma tACS in enhancing attention (Hopfinger et al., 2017, Wostmann et  
19 al., 2018), we propose that gamma tACS may serve as a potential therapeutic  
20 intervention for a wide range of neuropsychiatric conditions, irrespective of specific  
21 diagnoses. Furthermore, attention, a fundamental cognitive capacity, enables  
22 individuals to allocate resources and maintain focus on cognitive tasks to facilitate  
23 various cognitive functions. This study offers a new caveat for research on the use of  
24 gamma tACS to improve cognitive impairment, prompting consideration of whether

1 the cognitive enhancement observed with tACS treatment is attributable to  
2 improved attention. We acknowledged that the results of this preliminary report  
3 could be contaminated by practice effects. Double-blind and sham-controlled  
4 research is warranted to verify its efficacy and to clarify its role as an adjunct  
5 treatment for various conditions of attention and cognitive impairment.

6

7

## 1     **Authors Contributions**

2     All authors contributed intellectually to this work. TW Lee and A Sergio carried out  
3     the analysis and wrote the first draft together. All authors revised and approved the  
4     final version of the manuscript.

5

## 6     **Acknowledgments**

7     This work was supported by NeuroCognitive Institute (NCI) and NCI Clinical Research  
8     Foundation Inc.

9

## 10    **Financial support**

11    N/A.

12

## 13    **Statement of interest**

14    All authors declare no conflicts of interest.

15

## 16    **Ethical statement**

17    This IRB-approved research analyzed the databank collected from 2018 to 2022. The  
18    authors assert that all procedures contributing to this work comply with the ethical  
19    standards of the relevant national and institutional committees on human  
20    experimentation and with the Helsinki Declaration of 1975, as revised in 2008.

21

# References

- 2 **Brookes MJ, Wood JR, Stevenson CM, Zumer JM, White TP, Liddle PF and Morris PG**  
3 (2011) Changes in brain network activity during working memory tasks: a  
4 magnetoencephalography study. *Neuroimage*, **55**, 1804-15.
- 5 **Brzezicka A, Kaminski J, Reed CM, Chung JM, Mamelak AN and Rutishauser U** (2019)  
6 Working Memory Load-related Theta Power Decreases in Dorsolateral  
7 Prefrontal Cortex Predict Individual Differences in Performance. *J Cogn*  
8 *Neurosci*, **31**, 1290-1307.
- 9 **Dallmer-Zerbe I, Popp F, Lam AP, Philipsen A and Herrmann CS** (2020) Transcranial  
10 Alternating Current Stimulation (tACS) as a Tool to Modulate P300 Amplitude  
11 in Attention Deficit Hyperactivity Disorder (ADHD): Preliminary Findings. *Brain*  
12 *Topogr*, **33**, 191-207.
- 13 **Dasilva AF, Volz MS, Bikson M and Fregni F** (2011) Electrode positioning and  
14 montage in transcranial direct current stimulation. *J Vis Exp*.
- 15 **Diedrich L, Kolhoff HI, Chakalov I, Vékony T, Németh D and Antal A** (2024) Prefrontal  
16 theta-gamma transcranial alternating current stimulation improves  
17 non-declarative visuomotor learning in older adults. *Sci Rep*, **14**, 4955.
- 18 **Fan J, Byrne J, Worden MS, Guise KG, Mccandliss BD, Fossella J and Posner MI** (2007)  
19 The relation of brain oscillations to attentional networks. *J Neurosci*, **27**,  
20 6197-206.
- 21 **Fell J, Klaver P, Elger CE and Fernandez G** (2002) Suppression of EEG gamma activity  
22 may cause the attentional blink. *Conscious Cogn*, **11**, 114-22.
- 23 **Foster BL and Parvizi J** (2012) Resting oscillations and cross-frequency coupling in the  
24 human posteromedial cortex. *Neuroimage*, **60**, 384-91.
- 25 **Goodman MS, Kumar S, Zomorodi R, Ghazala Z, Cheam AS, Barr MS, Daskalakis ZJ,**  
26 **Blumberger DM, Fischer C and Flint A** (2018) Theta-gamma coupling and  
27 working memory in Alzheimer's dementia and mild cognitive impairment.  
28 *Frontiers in Aging Neuroscience*, **10**, 101.
- 29 **Guleyupoglu B, Schestatsky P, Edwards D, Fregni F and Bikson M** (2013)  
30 Classification of methods in transcranial electrical stimulation (tES) and  
31 evolving strategy from historical approaches to contemporary innovations. *J*  
32 *Neurosci Methods*, **219**, 297-311.
- 33 **Herrmann CS, Frund I and Lenz D** (2010) Human gamma-band activity: a review on  
34 cognitive and behavioral correlates and network models. *Neurosci Biobehav*  
35 *Rev*, **34**, 981-92.
- 36 **Hester R, Fassbender C and Garavan H** (2004) Individual differences in error  
37 processing: a review and reanalysis of three event-related fMRI studies using  
38 the GO/NOGO task. *Cereb Cortex*, **14**, 986-94.
- 39 **Hopfinger JB, Parsons J and Frohlich F** (2017) Differential effects of 10-Hz and 40-Hz  
40 transcranial alternating current stimulation (tACS) on endogenous versus  
41 exogenous attention. *Cogn Neurosci*, **8**, 102-111.
- 42 **Johnson BP, Pinar A, Fornito A, Nandam LS, Hester R and Bellgrove MA** (2015) Left  
43 anterior cingulate activity predicts intra-individual reaction time variability in  
44 healthy adults. *Neuropsychologia*, **72**, 22-6.
- 45 **Klimesch W** (1999) EEG alpha and theta oscillations reflect cognitive and memory  
46 performance: a review and analysis. *Brain Res Brain Res Rev*, **29**, 169-95.

- 1    **Leark RA, Greenberg LM, Kindschi C, Dupuy T and Hughes SJ** (2008) TOVA  
2       professional manual. *Los Alamitos, CA: TOVA Company.*
- 3    **Leark RA, Greenberg LM, Kindschi CL, Dupuy TR and Hughes SJ** (2007) Test of  
4       variables of attention continuous performance test. *The TOVA Company.*
- 5    **Lee TW, Li CS and Tramontano G** (2023) Tripod transcranial alternating current  
6       stimulation at 5-Hz over right hemisphere may relieve anxiety symptoms: a  
7       preliminary report. *medRxiv 2023.10.17.23296812.*
- 8    **Lee TW and Tramontano G** (2023) Neural consequences of 5-Hz transcranial  
9       alternating current stimulation over right hemisphere: an eLORETA EEG study.  
10      *medRxiv 2023.10.09.23296743.*
- 11   **Lundqvist M, Herman P, Warden MR, Brincat SL and Miller EK** (2018) Gamma and  
12      beta bursts during working memory readout suggest roles in its volitional  
13      control. *Nat Commun*, **9**, 394.
- 14   **Manippa V, Filardi M, Vilella D, Logroscino G and Rivolta D** (2024a) Gamma (60 Hz)  
15      auditory stimulation improves intrusions but not recall and working memory  
16      in healthy adults. *Behav Brain Res*, **456**, 114703.
- 17   **Manippa V, Palmisano A, Nitsche MA, Filardi M, Vilella D, Logroscino G and Rivolta**  
18      **D** (2024b) Cognitive and Neuropathophysiological Outcomes of Gamma-tACS  
19      in Dementia: A Systematic Review. *Neuropsychol Rev*, **34**, 338-361.
- 20   **Park J, Lee C, Lee S and Im CH** (2022) 80 Hz but not 40 Hz, transcranial alternating  
21      current stimulation of 80 Hz over right intraparietal sulcus increases  
22      visuospatial working memory capacity. *Sci Rep*, **12**, 13762.
- 23   **Shipp S** (2004) The brain circuitry of attention. *Trends Cogn Sci*, **8**, 223-30.
- 24   **Tam A, Luedke AC, Walsh JJ, Fernandez-Ruiz J and Garcia A** (2015) Effects of reaction  
25      time variability and age on brain activity during Stroop task performance.  
26      *Brain Imaging Behav*, **9**, 609-18.
- 27   **Thiebaut De Schotten M, Dell'acqua F, Forkel SJ, Simmons A, Vergani F, Murphy DG**  
28      **and Catani M** (2011) A lateralized brain network for visuospatial attention.  
29      *Nat Neurosci*, **14**, 1245-6.
- 30   **Varastegan S, Kazemi R, Rostami R, Khomami S, Zandbagleh A and Hadipour AL**  
31      (2023) Remember NIBS? tACS improves memory performance in elders with  
32      subjective memory complaints. *Geroscience*, **45**, 851-869.
- 33   **Wischnewski M, Berger TA, Opitz A and Alekseichuk I** (2024) Causal functional maps  
34      of brain rhythms in working memory. *Proc Natl Acad Sci U S A*, **121**,  
35      e2318528121.
- 36   **Wostmann M, Vosskuhl J, Obleser J and Herrmann CS** (2018) Opposite effects of  
37      lateralised transcranial alpha versus gamma stimulation on auditory spatial  
38      attention. *Brain Stimul*.
- 39   **Zaghi S, De Freitas Rezende L, De Oliveira LM, El-Nazer R, Menning S, Tadini L and**  
40      **Fregni F** (2010) Inhibition of motor cortex excitability with 15Hz transcranial  
41      alternating current stimulation (tACS). *Neurosci Lett*, **479**, 211-4.

42  
43

1 **Figure Legends**

2 Fig. 1. (A) An illustration of the F4 and P4 positions on the scalp. (B) Simulation of  
3 tACS at 40 Hz over left FP regions.

4
